# Supplementary material for: CAMK2N1/RUNX3 methylation is an independent prognostic biomarker for progression-free and overall survival of platinum-sensitive epithelial ovarian cancer patients
Source: PubMed Central journal article supplement (PMC7824928; doi:10.1186/s13148-021-01006-8), 2021-01-22
Supplement: 13148_2021_1006_MOESM1_ESM.pdf [file 13148_2021_1006_MOESM1_ESM.pdf]

Suppl. Figure S1

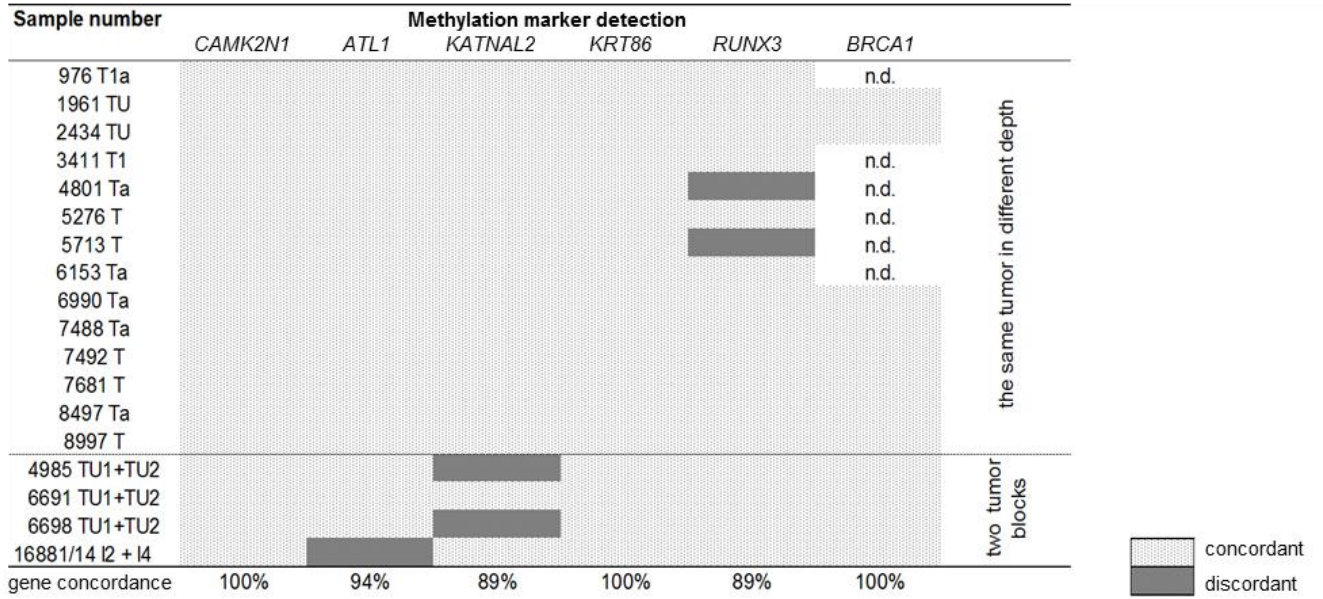

Figure S1: Validation of MSP assays. Different sections of the same tissue block (upper part) or different tumor blocks of the same patient (lower part) were analyzed for marker methylation by MSP. Concordant and discordant analyses are marked in grey and dar-grey, respectively. The gene-specific concordance ranges from 89%-100% and averages to 95% overall concordance (Cohen's Kappa = 0.881).

Suppl. Figure S2

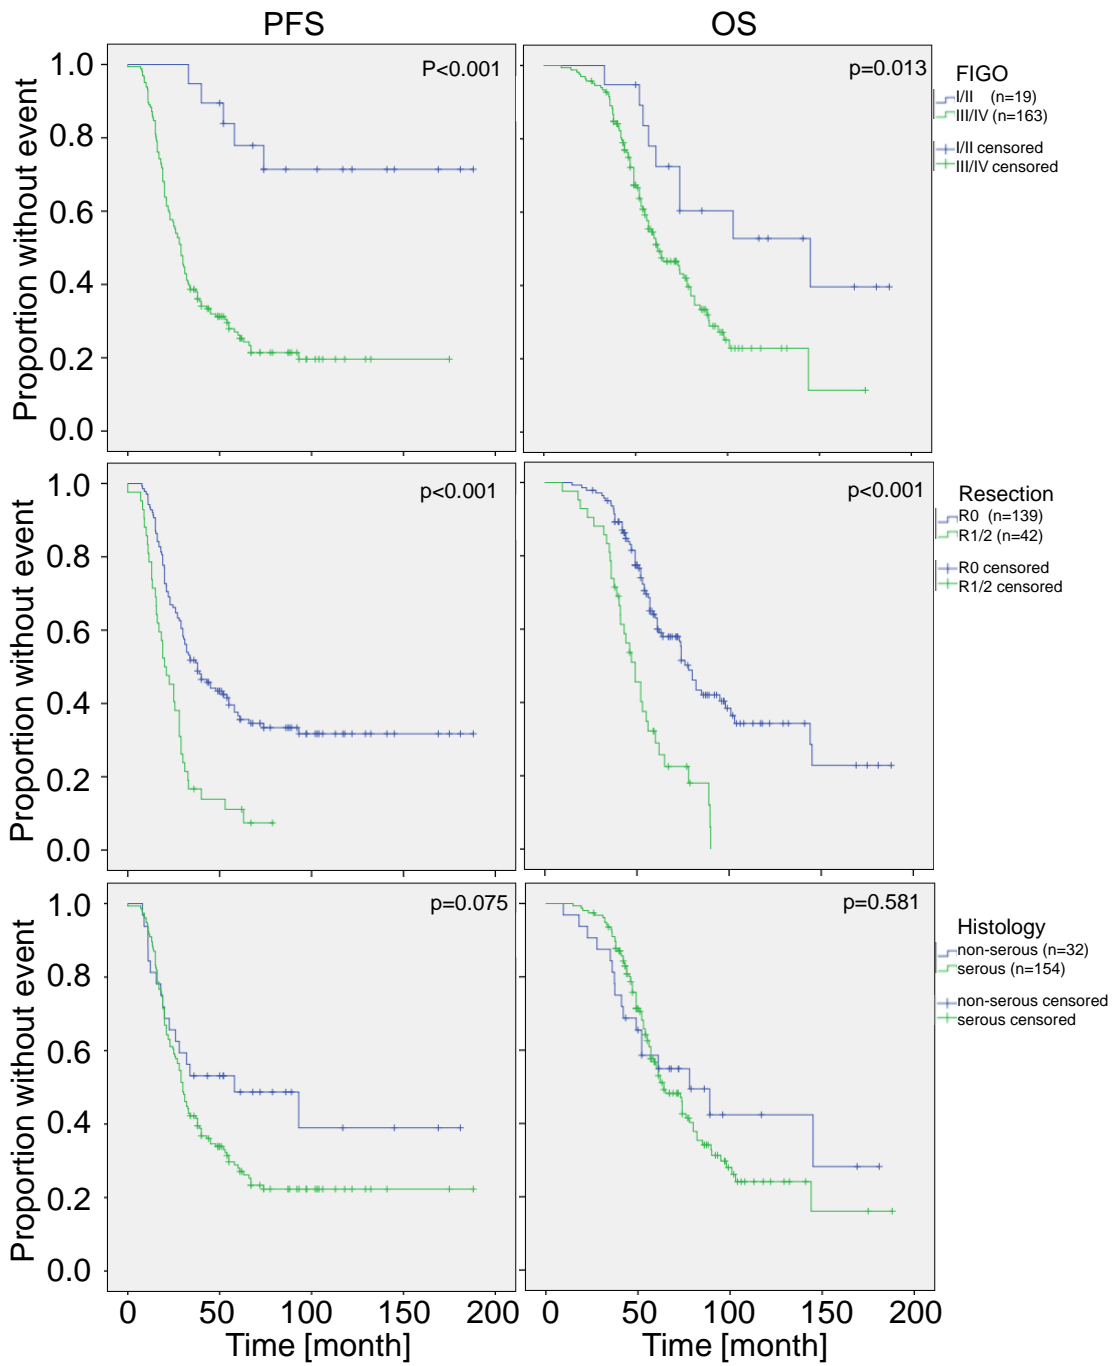

Figure S2: Kaplan-Meier plots for PFS and OS for 188 EOC patients stratified by FIGO stage, resection status and histology. LogRank test was utilized for statistical evaluation.

Suppl. Figure S3

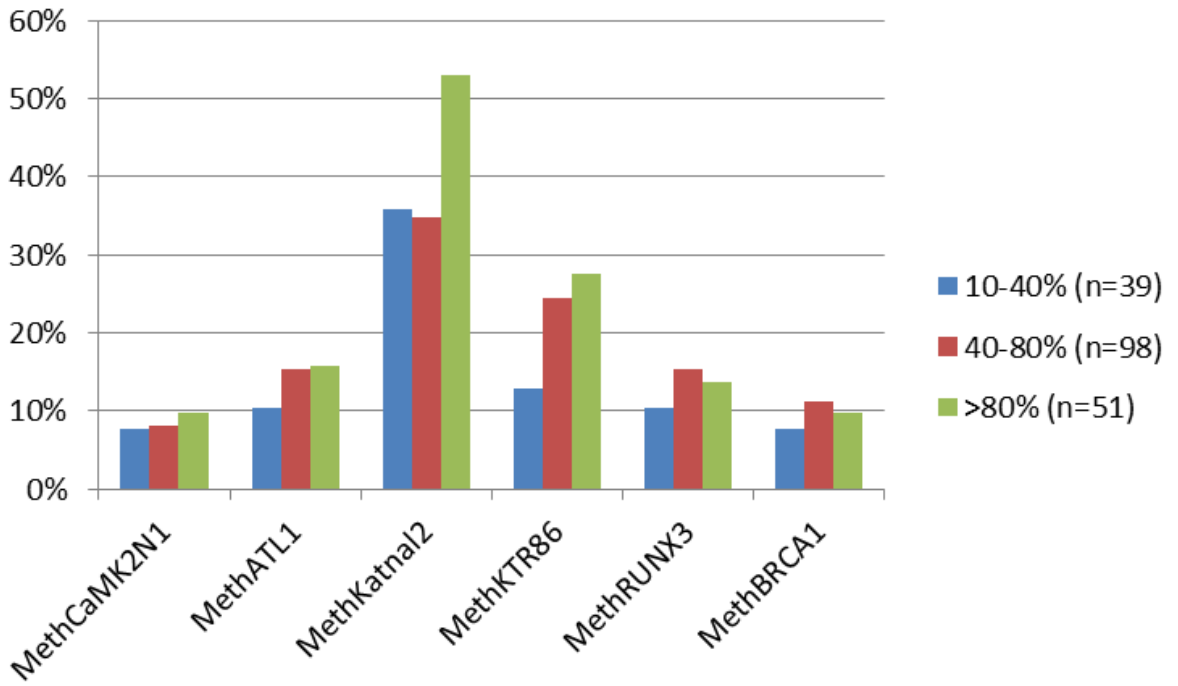

Figure S3: Methylation frequency of candidate genes depending on tumor cell fraction of tissues.

Suppl. Table S1. Data from EOC patients with HRD mutations

| sample   | age | histo    | pT | pN | pM | FIGO | G | R | mutation                                 |
|----------|-----|----------|----|----|----|------|---|---|------------------------------------------|
| 3325     | 39  | serous   | 1c | 0  | x  | IC   | 1 | 0 | BRCA1 c.1319T>C <sup>S#</sup>            |
| 8265     | 48  | mucinous | 3c | 1  | 1  | IV   | 3 | 0 | BRCA1 truncated <sup>S</sup>             |
| 8644     | 27  | mucinous | 1a | 1  | 0  | IA   | 1 | 0 | BRCA1 truncated <sup>S</sup>             |
| 8861     | 49  | serous   | 3c | x  | 0  | IIIC | 3 | 2 | BRCA1 c.5503C>T <sup>H</sup>             |
| 9473     | 48  | serous   | 3c | 0  | 1  | IIIC | 3 | 0 | BRCA1 c.3627 ins A <sup>S</sup>          |
| 9877     | 36  | serous   | 3b | 1  | 0  | IIIC | 2 | 0 | BRCA1 c.1067A>G <sup>S#</sup>            |
| 10003    | 63  | serous   | 3b | 1  | 0  | IIIC | 3 | 0 | BRCA1 mut                                |
| 10080    | 73  | serous   | 3c | x  | 0  | IVA  | 3 | 2 | BRCA2 c.5238dupT <sup>H</sup>            |
| 10163    | 53  | mucinous | 3c | 1  | 1  | IIIC | 3 | 0 | BRCA2 mut <sup>H</sup>                   |
| 10196    | 44  | serous   | 3c | x  | 1  | IIIC | 3 | 2 | BRCA2 c.1953_1956del <sup>H</sup>        |
| 16881/14 | 60  | serous   | 3c | 0  | 0  | IIIC | 3 | 0 | BRCA1 c.1953_1956del <sup>H</sup>        |
| 17571/15 | 49  | serous   | 3c | 1  | 0  | IIIC | 3 | 0 | BRCA1 c.5062G>T <sup>S</sup>             |
| 2878/16  | 45  | serous   | 3c | 1  | 0  | IIIC | 2 | 0 | BRCA1 c.5266depC <sup>H</sup>            |
| 14009/17 | 46  | serous   | 1c | 0  | 0  | IC   | 1 | 0 | RAD51C <sup>H</sup> , CHEK2 <sup>H</sup> |
| 14426/17 | 49  | serous   | 3c | 1  | 0  | IIIC | 3 | 0 | BRCA1 c.5080G>A <sup>H</sup>             |

H heterozygote, # unknown pathogenicity, S somatic mutation determined via exon analysis

Table S2 Overview of applied primer for MSP and *BRCA1* mutation analysis.

| Primer          | Oligo sequence              | product size | melting temp. | Localization*                              |
|-----------------|-----------------------------|--------------|---------------|--------------------------------------------|
| Actin beta-BS-F | TGGTGATGGAGGAGGTTTAGTAAGT   | 125bp        | 60 °C         | no CpG island, 1500nt upstream<br>1st exon |
| Actin-beta BS-R | AACCAATAAAACCTACTCCTCCCTTAA |              |               |                                            |
| ATL1-M-F        | AATTGCGTTTAGCGCGGGTAC       | 89bp         | 61 °C         | CpG island (CpG:52);<br>promoter+1st exon  |
| ATL1-M-R        | CGATAAACGCTATCACTACGCTCG    |              |               |                                            |
| BRCA1-M-F       | GCGAGTTTACGTCGCGTAGTC       | 84bp         | 60 °C         | CpG island; promoter+1st exon              |
| BRCA1-M-R       | AATTTCGTAACAACGAAAAAACG     |              |               |                                            |
| Katnal2-M-F     | TTATTGTTGTTGCGGGACGATTTTC   | 109bp        | 61 °C         | CpG island (CpG:23); 1st exon              |
| Katnal2-M-R     | AAATTTAACACCTCGACCGAACG     |              |               |                                            |
| KRT86-M-F       | TTTAGTTACGGGGGTTTCGGC       | 256bp        | 62 °C         | CpG island (CpG:63); last exon             |
| KRT86-M-R       | GCCACCGCGAAAACACTACTAACG    |              |               |                                            |
| CAMK2N1-M-F     | TAGTCGTTGGTCGATTGATTC       | 184bp        | 60 °C         | CpG island (CpG:245);<br>promoter+1st exon |
| CAMK2N1-M-R     | AACCTCGATCGACTACCG          |              |               |                                            |
| RUNX3-M-F       | GTGTTTCGATTTTCGGTTTAGCGTC   | 353bp        | 64 °C         | CpG island (CpG:311);<br>promoter+1st exon |
| RUNX3-M-R       | CGCTCGACTCCGAAACCTCG        |              |               |                                            |
| RUNX3-Pa-M-F    | TTAGCGTCGTTTCGGTAAAAATTC    | 127bp        | 60 °C         | CpG island (CpG:311);<br>promoter+1st exon |
| RUNX3-Pa-M-R    | ACCGCGAATAAAATACGAACG       |              |               |                                            |
| BRCA1-ORF1-F    | CACCCTCTGCTCTGGGTA          | 893bp        | 56 °C         |                                            |
| BRCA1-ORF1-R    | GCTGTAATGAGCTGGCATGA        |              |               |                                            |
| BRCA1-ORF2-F    | AGCTGAGAGGCATCCAGAAA        | 864bp        | 56 °C         |                                            |
| BRCA1-ORF2-R    | TGCTCCGTTTGGTTAGTTCC        |              |               |                                            |
| BRCA1-ORF3-F    | AAAGCAGATTTGGCAGTTCAA       | 883bp        | 56 °C         |                                            |
| BRCA1-ORF3-R    | GTCCCTTGGGGTTTTCAAAT        |              |               |                                            |
| BRCA1-ORF4-F    | GGAAGGCCAAAACAGAACCA        | 902bp        | 56 °C         |                                            |
| BRCA1-ORF4-R    | CTCAGGTTGCAAACCCCTA         |              |               |                                            |
| BRCA1-ORF5-F    | CAGAGGGCCAAAATTGAATG        | 900bp        | 56 °C         |                                            |
| BRCA1-ORF5-R    | TCACTCTCACACCCAGATGC        |              |               |                                            |
| BRCA1-ORF6-F    | CAAGAAGAGCAAAGCATGGA        | 901bp        | 56 °C         |                                            |
| BRCA1-ORF6-R    | CAGACACCACCATGGACATT        |              |               |                                            |
| BRCA1-ORF7-F    | TGCTGGGTATAATGCAATGG        | 775bp        | 56 °C         |                                            |
| BRCA1-ORF7-R    | AAGCTCATTCTTGGGGTCTCT       |              |               |                                            |

\* UCSC CpG island names parenthesized if available

Suppl. Tab. S3 BRCA1 immunohistochemistry results depending on BRCA1 aberrations\*

|           |               | BRCA1 aberration |      |      | total |     |
|-----------|---------------|------------------|------|------|-------|-----|
|           |               | wt               | mut  | meth |       |     |
| BRCA1_IHC | negativ       | n                | 2    | 3    | 2     | 7   |
|           |               | % of samples     | 8%   | 23%  | 67%   | 17% |
|           | weak positive | n                | 6    | 6    | 1     | 13  |
|           |               | % of samples     | 24%  | 46%  | 33%   | 32% |
|           | positive      | n                | 17   | 4    | 0     | 21  |
|           |               | % of samples     | 68%  | 31%  | 0%    | 51% |
| total     | n             | 25               | 13   | 3    | 41    |     |
|           | % of samples  | 100%             | 100% | 100% | 100%  |     |

\* Chi<sup>2</sup> test p<0.05
